# Supplementary material for: Inflammasome Sensor NLRP1 Controls Rat Macrophage Susceptibility to Toxoplasma gondii
Source: PLoS Pathog. 2014 Mar 13;10(3):e1003927. doi: 10.1371/journal.ppat.1003927 (PMC3953412; doi:10.1371/journal.ppat.1003927)
Supplement: Figure S3 — Fine-mapping of the Toxo1 region using whole transcriptome sequencing, SNP and haplotype analyses. Table was generated using SNPlotyper tool at RGD. Alternative SNP annotations can be found at that site. Shaded area indicates the new boundaries for Toxo1 locus based on comparison of the inbred and RI rat strain SNP genotypes for the 7 rat strains BN, F344 (CDF), LEW, SHR, HXB1, HXB15 and HXB59. (PDF) [file ppat.1003927.s003.pdf]

|                  |              |        | Animal SENSITIVITY TO TOXOPLASMOSIS                                                     | S  | S     | S     | R    | S    | R   | R   |
|------------------|--------------|--------|-----------------------------------------------------------------------------------------|----|-------|-------|------|------|-----|-----|
|                  |              |        | Macrophage SENSITIVITY TO PYROPTOSIS                                                    | R  | R     | R     | S    | R    | S   | S   |
| SYMBOL           | CHR 10 (Mbp) | ALLELE | SEQUENCE                                                                                | BN | HXB15 | HXB29 | HXB1 | F344 | LEW | SHR |
| ENSRNOSNP2796609 | 52519109     | A/G    | GCCCAAGTCTCTAAGCTCATCTGAGTTTCCCATGCGCAGCT[A/G]CAACTGTGGCTACGCCAGTCAGGTTCTCATCCAAGAGAGC  | AA | AA    | AA    | AA   | AA   | AA  | GG  |
| ENSRNOSNP2796612 | 53140716     | G/A    | ACCTGTTTCAAAAAGAAAAAGAAAGAAAGTAAAGAAAGAAAG[A/G]CAAAATGAAAGAAAAAGGCTTACAATGAATCTTTGTGTTT | GG | GG    | GG    | GG   | AA   | AA  | AA  |
| ENSRNOSNP2796615 | 53670113     | T/C    | CACAGTGACTTAATGGAGATTGGCTAGTTCTACACACCTCT[C]GTTCCTCTGTTCAAACCTTAAACCTCAGGTTAGGCCCTGAG   | TT | TT    | TT    | TT   | CC   | CC  | CC  |
| ENSRNOSNP2796617 | 54102210     | T/C    | CTGGGATCATTTAGCTCCTTTAAGGTTCCATATCCCTT[C]AAGCATCTAGGAAGTTGAGGAGATGCAAGTAGGAAGTAAG       | TT | TT    | TT    | TC   | CC   | CC  | CC  |
| ENSRNOSNP2796618 | 54201223     | T/C    | GTCTTGGTGACAGGCGTGGAGCCAGCTGTGGAAGACCTGT[C]JAGCCTGGGACCAAGTTCCCTGATGCTCTGCAGGAAGTGCTGC  | TT | TT    | TT    | CC   | CC   | CC  | CC  |
| D10Rat116        | 54220110     |        | Original Toxo1 boundary                                                                 |    |       |       |      |      |     |     |
| ENSRNOSNP2796619 | 54318945     | T/C    | TACACTTCGTTCTGCTGCGACCTGCATTAAATATTCTGCT[C]JAGGTTTGCACAGCAGGCTGGGGCTGTCTGCTGCTGACT      | TT | TT    | TT    | NN   | CC   | CC  | CC  |
| ENSRNOSNP2796620 | 54332699     | T/C    | TCCATGTGAGTTGTTTAAAGGGAATTTTCCCTGGTGAAGTTGGT[C]TGTGATTTCCTTTCCCTGCTTGAAGTGAAGTGAAGGTC   | TT | TT    | TT    | CC   | TT   | TT  | CC  |
| ENSRNOSNP2796622 | 54519676     | A/G    | TTAGATGTCATCGAGGGATCATGTCTCCCTACTGACAGGC[A/G]GGTAGGGTCACAGTGAAGTGTCTCCCTTGGGCCAGCCTTG   | AA | AA    | AA    | GG   | GG   | GG  | GG  |
| ENSRNOSNP2796624 | 54684722     | T/G    | AAATAAATGGAGCATACCTGCATAGGGCATAAAATCCACCA[T/G]TTTGAATTTGTGGCACACGTGTATAGTGTAAATCCACAGC  | TT | TT    | TT    | GG   | GG   | GG  | GG  |
| ENSRNOSNP2796627 | 54778134     | T/C    | CAAGACACTTCCTCTTTGTTTCCAAAGATAAAAGTAGCCTT[C]JAAAAGTTTTCCTATGCTGTACTTGGGAGTGGGTGACT      | TT | TT    | TT    | NN   | CC   | CC  | CC  |
| ENSRNOSNP2796628 | 54956642     | T/C    | AGTCCCGATGTGTAAGGCAAGCATGGTGCGGAGAAATATGC[T/C]GAACAGGATTGCTTAGTTCCCTGACAGCCAGGAAGCAGAAA | TT | TT    | TT    | CC   | CC   | CC  | CC  |
| ENSRNOSNP2796631 | 55154737     | T/C    | GACTCTGGGCACAACTGGGGAAAAAGACCCCTTAAGTTGGAAT[C]JAGGTTTGGGAAGGTATTAGTCAGGTGAAGAGAATAGAGA  | TT | TT    | TT    | CC   | CC   | CC  | CC  |
| ENSRNOSNP2796632 | 55154923     | C/T    | AAAGTGTCCAGCCTGTCTAAGAGCTGCACAGCTCAGTGC[C/T]TCTAATGTATCATTTTCAGAGAGGAGGAAACTGAGTCATAA   | CC | CC    | CC    | TT   | TT   | TT  | TT  |
| ENSRNOSNP2796633 | 55303964     | A/G    | AGGATAGAAAAGGAGGTGAGAGCTGATGGTTCAATATCT[A/G]TACAGAGTCTGTGGCTGAGGAAGGAACAGGAAGTAGGTA     | AA | AA    | AA    | GG   | GG   | GG  | GG  |
| ENSRNOSNP2796634 | 55329725     | C/G    | TAAAAGTTTGGGGAGATGATCTCAGGTGTGTTCCAGCTCT[C]GJAAATCTGTGAGTCTACATGGTAAATGAAGAGGTGGCAGG    | CC | CC    | CC    | GG   | GG   | GG  | GG  |
| ENSRNOSNP2796635 | 55383531     | A/G    | New Toxo1 boundary                                                                      |    |       |       |      |      |     |     |
| ENSRNOSNP2796636 | 55491552     | T/C    | CAGAGTGTACACAGTCCCAAGACTTGAAGAGGGCCCAAGGT[A/G]GGGCTGTTTGTGGGAAACTGAGGAAGGTCTGGGGTAAGAT  | AA | AA    | AA    | GG   | AA   | GG  | GG  |
| ENSRNOSNP2796637 | 55491552     | T/C    | AGGAAGCCGCTGTTCTTTGTGACCCTGCTCAGTCCCTGT[C]CTCCAGGTTCTGCTTGGCTGCTCCGCTGACTTCC            | TT | TT    | TT    | NN   | TT   | CC  | CC  |
| ENSRNOSNP2796637 | 55575040     | A/G    | CCCTGACCCTTCCACCACACCCGGCTTAGAGCATTTGTGA[A/G]CCCAACCTGCACTTGTCTCTCATTTCCCTGTAATAGTGAT   | AA | AA    | AA    | GG   | AA   | GG  | GG  |
| ENSRNOSNP2796638 | 55581313     | G/T    | GTTCACCATTAAGAATTTTGTGGAGGGAAGTATCTTCT[G/T]TAAACACATGATGATCCTATCCAGCTGCCAGAGTCCGA       | GG | GG    | GG    | TT   | GG   | TT  | TT  |
| ENSRNOSNP2796641 | 55622812     | A/G    | GCAATGACAGGGGTGAAAAGCAATGGAATGTTTCTGACCA[A/G]CCTGAGCTGATTGTATCACAGTCTCAGCCTAATTCCTCACT  | AA | AA    | AA    | NN   | AA   | GG  | GG  |
| ENSRNOSNP2796642 | 55717536     | A/G    | AAACAACGTAAAGGGGTGGAAGTGAACCCCTACCCAAGCCTG[A/G]GAGGAGGCTGCTGGGAGTTTGCAGGGGCAAGTCCCTGTCA | AA | AA    | AA    | GG   | GG   | GG  | GG  |
| ENSRNOSNP2796643 | 55727468     | C/T    | TTTTCTGCTCTTCCAGCTACCATTTTCGCAACTCCCGGTT[C/T]TCTTAAATACTATTTGTCGCCCTAATTTTGTCTGCTAG     | CC | CC    | CC    | TT   | TT   | TT  | TT  |
| ENSRNOSNP2796645 | 55815617     | A/G    | CAATGTCATACCTCAAGTCCCGGGGGGCTTAGGAACCTT[A/G]AATGATCCCTGTCCACACACCATGCGAGGGCGAGGGTACAC   | AA | AA    | AA    | GG   | AA   | GG  | GG  |
| ENSRNOSNP2796646 | 55985799     | T/C    | AAACAATTGCTTCCCAGGTTGGGACAGAAAGGAGGACGT[C]JGGGAACCACTTACTTAGTCACGTGATGTTGTGGTCTGA       | TT | TT    | TT    | CC   | TT   | CC  | CC  |
| ENSRNOSNP2796647 | 56049276     | T/C    | CTACCTCCCAACGACCATTTATGCTCCTTCTCGACCAAGT[C]JGGCCAGCGAGGACACTGACCAGAGGAAAGCTTTGCTAGTG    | TT | TT    | TT    | CC   | TT   | CC  | CC  |
| ENSRNOSNP2796649 | 56118824     | A/C    | GCCCATCTCACTTTGTGCAATTTGAGCCCTTCCACCTATC[A/C]GTCTCCCAAGAGCTTCAACCTGAAGGCCCTACCACCACTCA  | AA | AA    | AA    | CC   | AA   | CC  | CC  |
| ENSRNOSNP2796651 | 56691083     | C/G    | CCTGAAGCAAAAGCCTTCTTGGCATACACTGAGCTGGAC[C/G]JACAAGGGTGAAGTGGTGGGAGCCATTTGTGCTCCATC      | CC | CC    | CC    | GG   | CC   | GG  | GG  |
| ENSRNOSNP2796652 | 56691163     | A/G    | CCCTTCCCTCCTTCACTGCTGGCCCTGACAGAGGAGTATGTA/GTGAGACCCATTCTCCTTTGTGTTTACCATCTCCAGCAGT     | AA | AA    | AA    | GG   | AA   | GG  | GG  |
| ENSRNOSNP2796653 | 56691234     | T/C    | TCCAGCAGTCCCTATGCACACATAGCTTTTAAATTTCC[T]GTGCCCACTCCTTCCAGCCTTCCAGGGCCTTGCCACAG         | TT | TT    | TT    | CC   | TT   | CC  | CC  |
| ENSRNOSNP2796656 | 56856324     | G/A    | GAAGGGGGCCTGTGTTTGGCATAGAAGAAGGCACACGACT[G/A]GTCTAGGGCCTGATTAGGAGTCTTACAGCTCTAAGGGGGT   | GG | GG    | GG    | AA   | GG   | AA  | AA  |
| ENSRNOSNP2796657 | 57000555     | C/T    | TACTGCAGATTCCTCAATGCTTTAGAGGTTGCTTATGCCA[C/T]TGTGACAGTGAAGCCTTCACTGTCCCCCAGCCCCGCTAG    | CC | CC    | CC    | TT   | CC   | TT  | TT  |
| ENSRNOSNP2796659 | 57074418     | A/G    | GAAGTCAAAAGGTTGAGGTTGCTTATCAGGAACAGGGCGGGT[A/G]GCTCCAGCAGCCCTGACCCCTCTCTGCTGCAGTCCCTGC  | AA | AA    | AA    | GG   | AA   | GG  | GG  |
| ENSRNOSNP2796660 | 57077378     | A/G    | CTCGCCAGGTTAACAGTCCCAAGGACACCAAGATGAGTGG[A/G]ACAGATGAGCTAGGAGTCTTTAAATGAAGGAGGGAATGG    | AA | AA    | AA    | GG   | AA   | GG  | GG  |
| ENSRNOSNP2796662 | 57261171     | A/C    | CAGAGGTTTGGGGCAAGAGGTTGGCAAGTGTGAGGTGACG[C/A]CTAGGATACGAAGCAAAATCATGTTATAACTGTAAGAATGA  | AA | AA    | AA    | CC   | AA   | CC  | CC  |
| ENSRNOSNP2796663 | 57296249     | T/C    | TTGAACCTCGAAGTTTACACTCCACCTCTGACTGCACTTTT[C]JGACCCACATCTTGAAGATTACATTTTATAGAGGCAG       | TT | TT    | TT    | CC   | TT   | CC  | CC  |
| ENSRNOSNP2796664 | 57302933     | A/G    | TTTCCGACAGAGCTTGCCCCCTGCACCTCTCCTGCTCTTTT[A/G]CTGTGACGGATTGAGCATGGCACCATTCTGGGCAATTGATC | AA | AA    | AA    | GG   | AA   | GG  | GG  |
| ENSRNOSNP2796667 | 57733535     | A/G    | TAGTAGCATGCTTAAAGCACCCTGAGGACGCTCAGTGC[A/G]TCACTTCCGGCTGACCCCTGGGGCTTGTCACTTTGGTGGAAA   | AA | AA    | AA    | GG   | GG   | GG  | GG  |
| ENSRNOSNP2796668 | 57841240     | T/G    | TCTGTGCTGGGCCGTGTGGGGATGGGCACCTCAGCCTG[T/G]CGCGGTGAGTCTGACTGCTGCACAGCTAGTGTGCATACAC     | TT | TT    | TT    | GG   | GG   | GG  | GG  |
| ENSRNOSNP2796669 | 57846880     | G/A    | AGGGAACACTAATGAGACTGCACTCGATTCCAACAGGC[G/A]TGGGATCAGATTGGGTGCCAGAAAAGTGTCTGTTTCCCTTG    | GG | GG    | GG    | AA   | GG   | AA  | AA  |
| ENSRNOSNP2796670 | 57875789     | T/C    | GAAACAGCCGGCACAAGCTCCTGAACAGGTACCGCCAGGCT[C]JGACAGTAGCACACTGGGGACAGCCTCAGACAGACTTCTTG   | TT | TT    | TT    | CC   | CC   | CC  | CC  |
| ENSRNOSNP2796671 | 57881403     | G/A    | AGGCTGGACAAGCCCCAAGCTGTCAAGTTTGTCTTTCTGA[G/A]GGTACTTGGTCTAGCTTATAAGCTACACTGTTGATGGCG    | GG | GG    | GG    | AA   | GG   | AA  | AA  |
| ENSRNOSNP2796673 | 58078553     | G/T    | CAAGATAAAGCCCATAGAAACAAAGTAGACATGATTAC[G/T]AGTGTAGAGGACAGGAGGAAATGGGAAGATGCCGTTCCCTC    | GG | GG    | GG    | TT   | GG   | TT  | TT  |
| ENSRNOSNP2796674 | 58178197     | T/A    | CAGTAGATGAAGGTATAAAATATCAGAGGCATGTGTATTT[A]AACTAAAGGGTAGAGACAGGAGTGGCTTGGGGAATAAGTGG    | TT | TT    | TT    | AA   | TT   | AA  | AA  |
| ENSRNOSNP2796675 | 58207771     | G/A    | CTCTCATCTCCTTTTATCTTTAGGGGTATCACTAAGCAGC[G/A]TAGGCTGGCTTTAAGCTTATCTGTAGGCTGGGAAGACCT    | GG | GG    | GG    | GG   | AA   | GG  | GG  |
| ENSRNOSNP2796676 | 58403857     | C/T    | CTACACTGCTTCTTCCACCTCACTCCATTTCTTCCATTA[C/T]AGTGCCACTGAAAAACACAAAATGATTCAGAGTCAATT      | CC | CC    | CC    | CT   | TT   | TT  | TT  |
| ENSRNOSNP2796677 | 58580166     | C/T    | GAGGGAAGACCCGCTGAAGGAAGTGAAGCTGAGGCATG[C/T]GATAGCAGACAAGGACCAAGTGCAGCAATGGGGGTGTGTG     | CC | CC    | CC    | CT   | CC   | TT  | TT  |
| ENSRNOSNP2796679 | 58644488     | C/T    | CGCTTCGGAGATGTGATGCTTCCATATGTGTCGTGAG[C/T]GAGGAGCGGCTTCTGTGTGGAGAACACAAAGAGGGCA         | CC | CC    | CC    | CT   | CC   | TT  | TT  |
|                  |              |        | New Toxo1 boundary                                                                      |    |       |       |      |      |     |     |
| ENSRNOSNP2796683 | 59247028     | A/C    | TTGAGTCTAGCCCCAGTAGCTTTCATCAGGGTTGTTAGGT[A/C]ACAGCCATACTAAGCATGTTATCTTACCAAGTTTCTTGT    | AA | AA    | CC    | NN   | AA   | CC  | CC  |
| ENSRNOSNP2796684 | 59585017     | G/C    | CTGTGTTCACTTTTCTCAGCTGGTTTACTCATCCACAGC[G/C]TCTTAAAGTTTTCCTGATCTCTTTAAAGCAAAACCCGGTCT   | GG | GG    | CC    | GC   | CC   | CC  | CC  |
| ENSRNOSNP2796685 | 59591479     | T/C    | TGTGAGCCAAAATAGCTTTTCTCATTTAGTTGCTTTTG[T/C]JAAAAGATTTTCTCTCGTAATAAGGACAGTGGCAGGACA      | TT | TT    | CC    | TC   | CC   | CC  | CC  |
| ENSRNOSNP2796687 | 59686974     | A/T    | CTACCTCTTACCCCCAAGCTTGGATCAAGGTTGTGCT[C/A]TJACCAATTAATATCATGTACCATATATGACAGAAATTA       | AA | AA    | TT    | AT   | TT   | TT  | TT  |
| ENSRNOSNP2796688 | 59894217     | C/A    | CTTCTCCCCACCTACAACCTTCTCCCCGCCACACACAC[C/A]CCCCAAATAGCTTACTGCTTTGGGATTACGCCTCATCCAC     | CC | CC    | AA    | CA   | AA   | AA  | AA  |
| ENSRNOSNP2796689 | 59923802     | A/G    | ACAATACAGTCTCACAAAGCCAGCATCAGTCTAGGAG[C/A]GGGATTCCCTGTGCTCAGGCTGACCTGGGCGATAGGCTGCG     | AA | AA    | GG    | AG   | GG   | GG  | GG  |
| ENSRNOSNP2796690 | 60056457     | C/T    | AGAACAGGTCCTGAGGGTTGGAGTGATGGTATAATAGGCG[C/T]GACACCCCTTACAGTGCCATGTCACTTTCTGGTCTGGCTG   | CC | CC    | TT    | NN   | CC   | TT  | TT  |
| ENSRNOSNP2796691 | 60099652     | T/C    | TGCTGTGCTCTCAGGAACGCTGCTCAGGCTGCTTACCT[C]JGAGTCCCTCTCAACCAACCCGCTTAAAGGCAGCTGCCAG       | TT | TT    | CC    | TC   | CC   | CC  | CC  |
| ENSRNOSNP2796695 | 60454159     | C/T    | TCTTTCCTTCTACATGTACCTTTTGTAAATTTTCTTTA[C/T]JAGTTCTAAAAATTTTGTGTTTGAAGTCCATTGTTACAT      | CC | CC    | TT    | CT   | TT   | TT  | TT  |
| ENSRNOSNP2796698 | 60882199     | T/A    | TCTGTGTAGACTGTCTCCTTTTCCGAGTTGTCCAGCA[T/A]CAATGGCTTAAAGTCTCCAAGCTTAGAAGCATTTGAGAA       | TT | TT    | AA    | TA   | AA   | AA  | AA  |
| ENSRNOSNP2796701 | 61541376     | A/G    | GCTTGGCTCTCTAAGCTCCTCTTCTCTCTCAAGAG[C/A]GTTCACTTGCCTTCAAGCTCAGAGCTGGGCGATATGTT          | AA | AA    | GG    | AG   | GG   | GG  | GG  |
| ENSRNOSNP2796702 | 61581419     | G/C    | TGCTAGAACCCTATAATAATTTGTTGTTTCTTTATGAC[G/C]TTTGGTTAATGGTTTGAACATCTTTTGAATGTGCTCTGA      | GG | GG    | CC    | GC   | CC   | CC  | CC  |
| ENSRNOSNP2796704 | 61724019     | C/A    | CATTTTTAACTTCGATGATAAACGATAATATGGGTTAAAAG[C/A]JGTTCTGTTTGTGTTTACAACTTTAAAGATAGTATCCC    | CC | CC    | AA    | CA   | AA   | AA  | AA  |
| D10Rat80         | 61798249     |        | Original Toxo1 boundary                                                                 |    |       |       |      |      |     |     |
