# Supplementary material for: Inflammasome Sensor NLRP1 Controls Rat Macrophage Susceptibility to Toxoplasma gondii
Source: PubMed Central journal article supplement (PMC3953412; doi:10.1371/journal.ppat.1003927), 2014-03-13
Supplement: ppat.1003927.s002.pdf [file ppat.1003927.s002.pdf]

|             | <u>LEW</u> | <u>CDF</u> | <u>LEW</u> | <u>CDF</u> | <u>SD</u> | <u>SD</u> | <u>SD</u> |
|-------------|------------|------------|------------|------------|-----------|-----------|-----------|
| <b>LPS</b>  | +          | +          | +          | +          | +         | +         | +         |
| <b>LT</b>   | +          | +          | -          | -          | -         | -         | -         |
| <b>NIG</b>  | -          | -          | +          | +          | +         | -         | -         |
| <b>TOXO</b> | -          | -          | -          | -          | -         | +         | +         |

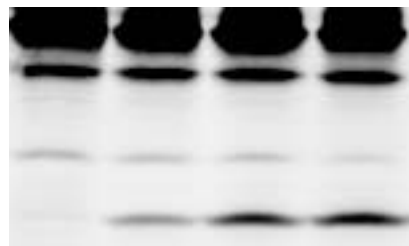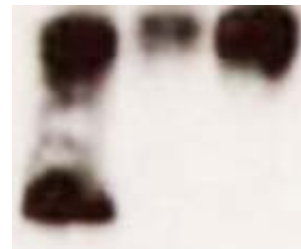

← 37kDa

← 17kDa

Figure S2
