# Supplementary material for: Inflammasome Sensor NLRP1 Controls Rat Macrophage Susceptibility to Toxoplasma gondii
Source: PubMed Central journal article supplement (PMC3953412; doi:10.1371/journal.ppat.1003927), 2014-03-13
Supplement: ppat.1003927.s004.pdf [file ppat.1003927.s004.pdf]

**Subset of genes expressed in LEW BMDMs (+/- LPS) with non-synonymous SNPs**

| GENE          | Start    | End      | LEWIS-NS | LEWIS-LPS | SD-NS  | SD-LPS | BN-LPS | NS SNP<br>(All rats)<br>(Ensembl) | Different in<br>SHR vs<br>F334/BN<br>(RGD) | Different in<br>SD/BN vs.<br>LEWIS<br>(RNAseq) |
|---------------|----------|----------|----------|-----------|--------|--------|--------|-----------------------------------|--------------------------------------------|------------------------------------------------|
| <b>Aurkb</b>  | 55798709 | 55804367 | 20.4     | 4.2       | 15.8   | 9.4    | 11.8   |                                   | YES                                        | YES                                            |
| <b>Neur14</b> | 56745821 | 56757435 | 5.1      | 2.5       | 4.0    | 3.6    | 3.4    | YES                               | YES                                        | YES                                            |
| <b>Cxcl16</b> | 57296125 | 57307217 | 100.5    | 264.3     | 111.6  | 368.1  | 262.9  | YES                               | YES                                        | YES                                            |
| <b>Nlrp1</b>  | 57963707 | 58007925 | 4.5      | 9.8       | 4.8    | 13.5   | 13.0   | YES                               | YES                                        | YES                                            |
| Tp53          | 56399720 | 56411150 | 36.9     | 45.3      | 38.1   | 60.9   | 59.5   | YES                               | YES                                        | NO                                             |
| Dlg4          | 56864458 | 56890626 | 2.3      | 3.1       | 2.2    | 2.9    | 2.3    | YES                               | YES                                        | NO                                             |
| Arrb2         | 57244070 | 57284166 | 23.0     | 6.5       | 24.1   | 8.7    | 10.0   | YES                               | YES                                        | NO                                             |
| <b>Rabep1</b> | 57746746 | 57847498 | 9.5      | 18.1      | 7.6    | 12.0   | 11.1   | YES                               | NO                                         | YES                                            |
| Rpl26         | 55662219 | 55665752 | 42.8     | 18.5      | 57.1   | 30.0   | 33.5   | YES                               | NO                                         |                                                |
| RGD1563106    | 55768181 | 55788836 | 4.8      | 2.5       | 5.4    | 2.2    | 2.4    | YES                               | NO                                         |                                                |
| Trappc1       | 56117228 | 56118815 | 68.7     | 66.7      | 57.4   | 56.9   | 62.5   | YES                               | NO                                         |                                                |
| Lsm1          | 56190118 | 56192730 | 50.7     | 27.4      | 45.0   | 26.6   | 33.8   | YES                               | NO                                         |                                                |
| Eif4a1        | 56484231 | 56489739 | 348.4    | 422.1     | 335.2  | 312.3  | 307.2  | YES                               | NO                                         |                                                |
| Rnasek        | 57077235 | 57078954 | 469.0    | 569.9     | 502.9  | 514.6  | 490.9  | YES                               |                                            |                                                |
| Psm6          | 57370396 | 57372704 | 34.4     | 25.6      | 35.8   | 27.8   | 24.6   | YES                               |                                            |                                                |
| Pfn1          | 57531660 | 57534366 | 1123.6   | 1085.2    | 1133.8 | 1077.0 | 1134.6 | YES                               |                                            |                                                |
| Kif1c         | 57580645 | 57622517 | 30.8     | 31.0      | 27.8   | 24.3   | 19.6   | YES                               |                                            |                                                |
| C1qbp         | 57881782 | 57886434 | 113.0    | 72.1      | 96.4   | 87.7   | 97.2   | YES                               |                                            |                                                |
| Txn17         | 59100037 | 59103010 | 135.1    | 107.9     | 165.1  | 76.9   | 81.8   | YES                               |                                            |                                                |
| XAF1          | 59185149 | 59196549 | 8.4      | 248.9     | 7.4    | 252.9  | 216.8  | YES                               |                                            |                                                |
