# Supplementary material for: Inflammasome Sensor NLRP1 Controls Rat Macrophage Susceptibility to Toxoplasma gondii
Source: PubMed Central journal article supplement (PMC3953412; doi:10.1371/journal.ppat.1003927), 2014-03-13

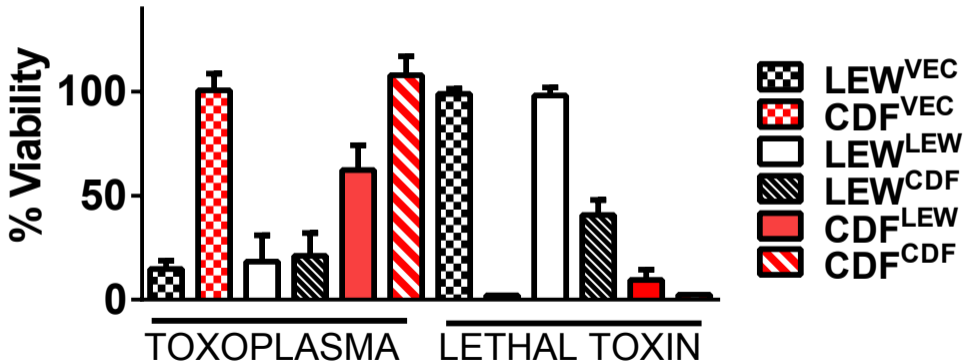

Supplement: ppat.1003927.s007.pdf [file ppat.1003927.s007.pdf]
